# Supplementary material
Source: Research Square preprint supplement (doi:10.21203/rs.3.rs-9173851/v1)
Supplement: Supplementary file 1 [file 602d052764e194f524fe4750.xlsx]

## Sheet: Sheet1
Disease;CTD:0, CTD-ILD:1	Sex;male 1	Age	NLR	SII	MLR	PLR	KL-6	WBC	NEUT%	NEUT	LYMPM%	LYMPM	MONO%	MONO	EO%	EO	BASO%	BASO	RBC	HB	HCT	MCV	MCH	MCHC	RDW SD	RDW CV	PLT	PDW	PCT	MPV
1	0	46	2.79798	945.717	0.318182	170.707	886.78	8.21	67.5	5.54	24.1	1.98	7.7	0.63	0.2	0.02	0.5	0.04	3.72	117	0.352	94.6	31.5	332	51.7	14.9	338	9.8	0.32	9.5
1	0	47	1.29231	254.585	0.230769	101.026	5499.54	5.11	49.3	2.52	38.2	1.95	8.8	0.45	3.1	0.16	0.6	0.03	4.8	139	0.433	90.2	29	321	49	14.8	197	14.8	0.22	11.4
1	1	59	3.49662	898.632	0.503378	86.8243	1846.58	15.49	66.8	10.35	19.1	2.96	9.6	1.49	3.9	0.6	0.6	0.09	4.24	118	0.367	86.5	27.7	321	42.5	13.3	257	16.3	0.307	11.9
1	0	58	3.69903	580.748	0.368932	152.427	1469.42	5.28	72.2	3.81	19.5	1.03	7.2	0.38	0.9	0.05	0.2	0.01	3.94	111	0.357	90.6	28.2	311	56	16.9	157	10.9	0.16	10.3
1	0	63	5.29703	1165.35	0.108911	217.822	4854.06	6.47	82.7	5.35	15.6	1.01	1.7	0.11	0	0	0	0	4.53	146	0.436	96.2	32.2	335	46.4	13.2	220	15.8	0.215	9.8
1	0	66	4.27966	1091.31	0.144068	216.102	4224.5	6.4	78.8	5.05	18.5	1.18	2.7	0.17	0	0	0	0	3.67	116	0.345	94.2	31.6	335	51.4	15	255	15.9	0.241	9.5
1	0	59	2.1828	691.946	0.209677	170.43	3886.63	6.37	63.7	4.06	29.2	1.86	6.1	0.39	0.8	0.05	0.2	0.01	4.18	123	0.38	91	29.4	323	46.9	14.1	317	16.2	0.295	9.3
1	0	58	7.49153	5026.81	0.581921	379.096	3297.38	17.47	76	13.26	10.1	1.77	5.9	1.03	7.7	1.35	0.3	0.06	4.19	123	0.365	87.1	29.4	337	43.8	14	671	9.1	0.59	8.7
1	0	73	1.93827	325.63	0.339506	103.704	3283.23	5.54	56.8	3.14	29.2	1.62	9.9	0.55	3.6	0.2	0.5	0.03	4.09	130	0.391	95.6	31.8	332	42.2	12.2	168	9.1	0.15	9
1	1	51	4.77348	2033.5	0.569061	235.359	3235.96	11.61	74.4	8.64	15.6	1.81	8.9	1.03	0.8	0.09	0.3	0.04	4.93	144	0.45	91.3	29.2	320	41.7	12.5	426	9.6	0.38	9
1	0	81	5.04396	1260.99	0.417582	274.725	2579.93	6.12	75.1	4.59	14.8	0.91	6.2	0.38	3.8	0.23	0.1	0.01	3.81	109	0.346	90.9	28.6	315	48.5	14.5	250	15.7	0.201	8
1	1	72	5.08081	701.152	0.757576	139.394	2296.7	7.14	70.4	5.03	13.9	0.99	10.5	0.75	4.2	0.3	1	0.07	6.42	200	0.594	92.5	31.2	337	49	15.2	138	14.4	0.16	11.5
1	0	51	1.81215	494.718	0.232044	150.829	1994.84	5.6	58.6	3.28	32.3	1.81	7.5	0.42	1.4	0.08	0.2	0.01	4.3	124	0.402	93.5	28.8	308	43.2	12.6	273	10.4	0.26	9.6
1	1	70	8.95	1387.25	0.3625	193.75	1909.53	8.4	85.3	7.16	9.5	0.8	3.4	0.29	1.8	0.15	0	0	4.64	141	0.428	92.4	30.4	329	45.8	13.4	155	17	0.167	10.8
1	1	81	2.80132	479.026	0.324503	113.245	1902.17	6.55	64.5	4.23	23.1	1.51	7.5	0.49	4.4	0.29	0.5	0.03	5.22	154	0.491	94.1	29.5	314	51.2	15	171	13.2	0.2	11.5
1	0	58	7.62308	1318.79	0.4	133.077	1702.53	11.77	84.2	9.91	11	1.3	4.4	0.52	0.2	0.02	0.2	0.02	4.24	124	0.384	90.6	29.2	323	52.6	15.9	173	11	0.17	9.7
1	0	61	6.38346	2195.91	0.466165	258.647	1678.51	10.62	80	8.49	12.5	1.33	5.8	0.62	1.5	0.16	0.2	0.02	4.12	138	0.426	103.4	33.4	323	56.9	15.1	344	16	0.34	9.9
1	0	54	1.3384	191.392	0.277567	54.3726	1533.07	6.98	50.4	3.52	37.7	2.63	10.5	0.73	1.1	0.08	0.3	0.02	3.86	123	0.374	96.9	31.9	329	48	13.5	143	19.5	0.19	13.1
1	1	68	7.39	1640.58	0.88	222	1529.08	9.53	77.6	7.39	10.5	1	9.2	0.88	2.3	0.22	0.4	0.04	5.28	140	0.456	86.4	26.5	307	45.3	14.4	222	15.5	0.27	12.1
1	0	50	17.28	3732.48	0.973333	288	1524.79	14.52	89.3	12.96	5.2	0.75	5	0.73	0.2	0.03	0.3	0.05	5.41	124	0.413	76.3	22.9	300	48.4	17.8	216	16.3	0.23	10.9
1	1	65	2.61224	394.449	0.442177	102.721	1442.78	6.32	60.7	3.84	23.3	1.47	10.3	0.65	5.1	0.32	0.6	0.04	4.75	147	0.445	93.7	30.9	330	47.7	14	151	14.8	0.17	11.5
1	0	65	3.20652	808.043	1.09783	273.913	1281.28	4.94	59.8	2.95	18.6	0.92	20.4	1.01	0.8	0.04	0.4	0.02	3.88	132	0.395	101.8	34	334	51.1	13.6	252	11.1	0.26	10.3
1	0	50	3.40367	1164.06	0.40367	313.761	1276.61	5.27	70.4	3.71	20.7	1.09	8.3	0.44	0.4	0.02	0.2	0.01	4.46	96	0.353	79.1	21.5	272	48	16.8	342	8.6	0.3	9.3
1	0	65	1.78723	325.277	0.287234	193.617	1261.82	2.94	56.9	1.68	32.1	0.94	9.3	0.27	1.6	0.05	0.1	0	3.73	111	0.352	94.3	29.8	316	44.2	12.7	182	16.3	0.178	9.7
1	0	69	2.04717	286.604	0.207547	132.075	1261.82	3.66	59.1	2.17	28.9	1.06	6.1	0.22	5.5	0.2	0.4	0.01	4	126	0.366	91.4	31.5	344	43.2	12.8	140	16.2	0.136	9.7
1	1	58	7.71429	1087.71	0.642857	335.714	1205.44	3.96	81.8	3.24	10.7	0.42	6.7	0.27	0.5	0.02	0.3	0.01	3.75	107	0.333	88.8	28.7	323	43.4	13.2	141	16.5	0.152	10.8
1	0	45	3.13043	1324.17	0.288043	229.891	1198.36	8.35	69.1	5.76	22	1.84	6.3	0.53	2	0.17	0.6	0.05	4.86	136	0.428	88.1	28	318	46.6	14.5	423	13.7	0.48	11.4
1	1	59	1.37419	254.226	0.212903	59.6774	1112.62	8.17	52.2	4.26	37.9	3.1	8.1	0.66	1.3	0.11	0.5	0.04	4.77	162	0.489	102.5	34	331	53.3	14.1	185	14.6	0.21	11.3
1	0	55	2.68261	536.522	0.369565	86.9565	1093.37	9.35	66	6.17	24.6	2.3	9.1	0.85	0.2	0.02	0.1	0.01	3.9	129	0.391	100.3	33.1	330	49.4	13.3	200	15	0.23	11.7
1	0	49	3.75362	1336.29	0.485507	257.971	1003.28	7.35	70.4	5.18	18.8	1.38	9.1	0.67	1.4	0.1	0.3	0.02	4.12	125	0.382	92.7	30.3	327	45.7	13.5	356	10.1	0.34	9.5
1	0	57	2.41509	623.094	0.176101	162.264	973.65	5.81	66.3	3.84	27.3	1.59	4.8	0.28	1.5	0.09	0.1	0.01	3.67	99	0.322	87.7	26.9	306	52	16	258	16.3	0.295	11.4
1	0	74	2.13295	684.676	0.208092	185.549	962.07	6.09	60.6	3.69	28.4	1.73	5.9	0.36	4.4	0.27	0.7	0.04	3.7	112	0.356	96.2	30.3	315	49.9	14.1	321	9.2	0.3	9.3
1	1	32	4.86076	908.962	0.721519	118.354	920.42	10.78	71.2	7.68	14.7	1.58	10.6	1.14	3.2	0.35	0.3	0.03	5.08	141	0.445	87.6	27.8	317	45	14	187	18.4	0.24	12.9
1	0	62	4.38542	855.156	0.447917	203.125	909.52	5.83	72.1	4.21	16.5	0.96	7.4	0.43	3.6	0.21	0.4	0.02	4.51	125	0.404	89.5	27.7	310	45	13.6	195	17.5	0.213	10.9
1	0	81	2.89024	601.171	0.384146	126.829	865.6	7.34	64.6	4.74	22.3	1.64	8.6	0.63	4.1	0.3	0.4	0.03	3.8	111	0.352	92.6	29.2	315	45.7	13.6	208	10	0.2	9.8
1	1	72	9.11392	3472.41	0.56962	482.278	855.39	8.61	83.6	7.2	9.2	0.79	5.2	0.45	1.9	0.16	0.1	0.01	4.24	140	0.432	102.1	32.9	323	51.2	13.6	381	16.1	0.367	9.6
1	0	62	5.30769	1863	0.646154	540	851.13	4.7	73.5	3.45	13.8	0.65	8.9	0.42	3.4	0.16	0.4	0.02	3.93	109	0.349	88.8	27.7	312	46.3	14.5	351	8.9	0.31	8.9
1	1	74	9.16883	1962.13	0.207792	277.922	840.02	8.08	87.4	7.06	9.5	0.77	2	0.16	1.1	0.09	0	0	3.68	120	0.368	100	32.7	327	46.3	12.6	214	16.9	0.219	10.2
1	1	64	5.61878	2343.03	0.535912	230.387	796.99	13	78.2	10.17	13.9	1.81	7.5	0.97	0	0	0.4	0.05	3.52	117	0.332	94.3	33.2	352	58.1	17.2	417	9.6	0.39	9.4
1	0	70	3.17895	874.211	0.226316	144.737	740.26	8.4	71.9	6.04	22.6	1.9	5.1	0.43	0	0	0.4	0.03	4.39	129	0.401	91.3	29.4	322	41.5	12.5	275	11.4	0.3	10.8
1	0	71	8.2561	677	0.97561	100	696.86	8.5	79.7	6.77	9.6	0.82	9.4	0.8	1.1	0.09	0.2	0.02	2.28	81	0.27	118.4	35.5	300	74.6	17.3	82	11	0.09	11.1
1	1	71	3.07004	749.089	0.330739	94.9416	618.34	11.63	67.9	7.89	22.1	2.57	7.3	0.85	2.3	0.27	0.4	0.05	3.92	109	0.33	84.1	27.9	332	44.4	14.2	244	16	0.219	9
1	0	78	6.87234	1381.34	0.404255	213.83	592.65	7.93	81.4	6.46	11.9	0.94	4.8	0.38	1.4	0.11	0.5	0.04	3.7	121	0.354	95.7	32.7	342	50.6	14.5	201	9.2	0.19	9.2
1	0	89	56.1071	12848.5	0.857143	817.857	562.09	16.23	96.8	15.71	1.7	0.28	1.5	0.24	0	0	0	0	3.38	115	0.326	96.4	34.2	354	50.4	14.1	229	15.9	0.196	8.5
1	0	11	1.15466	318.686	0.148305	58.4746	502.85	10.9	50	5.45	43.3	4.72	6.4	0.7	0.3	0.03	0	0	4.29	132	0.414	96.5	30.9	320	49.1	13.8	276	15.9	0.26	9.4
1	1	58	11.3922	398.725	0.627451	68.6275	432.68	6.65	87.4	5.81	7.7	0.51	4.8	0.32	0	0	0.1	0.01	1.98	66	0.195	98.5	33.5	340	102.2	28.8	35	17.3	0.04	11.6
1	0	78	7.43956	2708	0.538462	400	431.7	8.18	82.8	6.77	11.1	0.91	6	0.49	0.1	0.01	0	0	3.25	95	0.304	93.5	29.4	314	43.4	12.6	364	15.3	0.304	8.3
1	0	47	3.85143	658.594	0.16	97.7143	419.03	8.79	76.7	6.74	19.9	1.75	3.2	0.28	0	0	0.2	0.02	3.82	115	0.356	93.2	30.1	323	44.4	13.1	171	12.3	0.18	10.6
1	0	69	1.47099	314.792	0.368601	73.0375	238.05	8.36	51.7	4.31	35	2.93	12.9	1.08	0.2	0.02	0.2	0.02	2.92	98	0.289	99	33.6	339	48.3	13.3	214	8.4	0.19	8.8
1	0	71	1.19437	263.957	0.130435	56.5217	138.32	9.28	50.4	4.67	42.1	3.91	5.5	0.51	1.7	0.16	0.3	0.03	4.26	131	0.406	95.3	30.8	323	46.6	13.2	221	10.2	0.22	9.9
1	0	49	2.22857	425.657	0.271429	136.429	138.32	4.99	62.5	3.12	28.1	1.4	7.6	0.38	1	0.05	0.8	0.04	4.6	144	0.421	91.5	31.3	342	41.2	12.4	191	12.8	0.21	11
1	1	71	2.64885	331.107	0.221374	95.4198	532.15	5.2	66.7	3.47	25.2	1.31	5.6	0.29	1.5	0.08	1	0.05	6.87	198	0.642	93.4	28.8	308	57.7	18.5	125	16	0.15	12.4
1	0	29	1.4186	348.977	0.169435	81.7276	1107.82	7.83	54.6	4.27	38.5	3.01	6.5	0.51	0.2	0.02	0.2	0.002	4.33	111	0.356	82.3	25.7	313	45.3	14.9	246	16.4	0.225	9.1
1	0	63	2.35573	727.921	0.237154	122.134	462.68	9.36	63.7	5.96	27	2.53	6.4	0.6	2.4	0.22	0.5	0.05	4.27	122	0.375	87.8	28.4	324	44.3	13.8	309	16	0.278	9
1	1	58	4.05028	1271.79	0.268156	175.419	261.47	9.65	75.2	7.25	18.5	1.79	5	0.48	0.9	0.09	0.4	0.04	3.75	107	0.335	89.3	28.5	319	49.8	15.2	314	8.5	0.27	8.6
1	0	59	1.45455	170.182	0.469697	177.273	663.7	1.97	48.5	0.96	33.5	0.66	15.7	0.31	0.7	0.01	1.6	0.03	3.42	110	0.335	97.9	32.1	328	47.1	13.2	117	16.3	0.115	9.9
1	1	66	0.855895	179.738	0.161572	91.7031	877.47	4.97	39.5	1.96	46.1	2.29	7.4	0.37	6.4	0.32	0.6	0.03	3.25	114	0.35	107.7	35.1	326	63.3	15.9	210	9.6	0.21	10
1	0	75	13.0541	4647.24	0.527027	481.081	2479.98	10.79	89.5	9.66	6.9	0.74	3.6	0.39	0	0	0	0	4.16	131	0.41	98.6	31.6	321	50.3	14	356	16	0.343	9.6
1	1	82	5.91429	650.571	0.52381	104.762	956.26	7.82	79.5	6.21	13.4	1.05	7	0.55	0.1	0.01	0	0	4.63	142	0.438	94.6	30.7	324	47.1	13.4	110	11.6	0.1	9.5
1	1	69	3.5814	537.209	0.0232558	174.419	1588.99	3.99	77.1	3.08	21.6	0.86	0.5	0.02	0.5	0.02	0.3	0.01	3.72	101	0.318	85.5	27.2	318	51.4	16.4	150	8.2	0.13	9
1	1	69	8.76471	2454.12	1.06863	274.51	1123.02	11.24	79.5	8.94	9.1	1.02	9.7	1.09	1.4	0.16	0.3	0.03	4.18	119	0.356	85.2	28.5	334	40.2	12.9	280	13.3	0.31	11.1
1	0	62	3.352	724.032	0.48	172.8	1877.37	6.19	67.7	4.19	20.2	1.25	9.7	0.6	1.9	0.12	0.5	0.03	5.02	153	0.473	94.2	30.5	323	47.7	13.7	216	16.7	0.27	12.3
1	0	63	2.39091	729.227	0.668182	138.636	719.07	9.24	56.9	5.26	23.8	2.2	15.9	1.47	2.2	0.2	1.2	0.11	4.47	130	0.408	91.3	29.1	319	51.1	15.4	305	15.8	0.38	12.3
1	1	48	2.22277	662.386	0.316832	147.525	885.09	7.44	60.3	4.49	27.2	2.02	8.6	0.64	3.2	0.24	0.7	0.05	5.17	156	0.474	91.7	30.2	329	45	13.2	298	15.4	0.35	11.7
1	1	60	4.37681	630.261	0.405797	208.696	1624.38	4.06	74.5	3.02	16.9	0.69	6.9	0.28	1.5	0.06	0.2	0.01	3.83	128	0.396	103.5	33.4	322	50.9	13.3	144	16.2	0.13	9
1	1	75	1.11111	323.333	0.126437	111.494	576.02	6.05	47.8	2.9	43.2	2.61	5.5	0.33	3.1	0.19	0.4	0.02	2.8	78	0.262	93.7	27.9	298	55.3	15.9	291	15.8	0.245	8.4
1	0	66	2.08088	518.14	0.25	183.088	357.96	4.69	60.3	2.83	29	1.36	7.2	0.34	3.4	0.16	0.1	0	4.35	130	0.398	91.5	29.9	327	42.8	12.6	249	16.1	0.231	9.3
1	0	77	4.26203	1466.14	0.529412	183.957	713.75	11.15	71.4	7.97	16.8	1.87	8.9	0.99	2.6	0.29	0.3	0.03	3.53	95	0.294	83.3	26.9	323	38.3	12.7	344	9	0.31	9
1	1	58	1.68966	371.724	0.203448	75.8621	791.8	8.52	57.5	4.9	34	2.9	6.9	0.59	1.1	0.09	0.5	0.04	5.17	153	0.475	91.9	29.6	322	43.7	12.9	220	13.6	0.24	10.9
1	0	77	0.801802	190.027	0.225225	106.757	132.11	4.65	38.3	1.78	47.7	2.22	10.8	0.5	2.8	0.13	0.4	0.02	2.6	80	0.254	97.7	30.8	315	48.1	13.4	237	9.1	0.22	9.3
1	1	70	12.25	379.75	1.01471	45.5882	333.66	9.85	84.6	8.33	6.9	0.68	7	0.69	1.4	0.14	0.1	0.01	2.44	75	0.242	99.2	30.7	310	54.4	15.1	31
1	0	31	3.95726	597.547	0.307692	129.06	291.85	6.18	74.9	4.63	18.9	1.17	5.8	0.36	0.2	0.01	0.2	0.01	2.99	103	0.335	112	34.4	307	70.5	17.6	151	9.5	0.15	10.2
1	0	72	6.12903	845.806	0.354839	222.581	237.03	4.65	81.8	3.8	13.3	0.62	4.7	0.22	0.2	0.01	0	0	2.88	83	0.277	96.3	28.8	299	78.1	21.9	138	16.3	0.141	10.2
1	0	72	14.8615	5038.06	2.16923	521.538	230.91	11.85	81.5	9.66	5.5	0.65	11.9	1.41	0.8	0.09	0.3	0.04	3.23	82	0.26	80.5	25.4	315	49	16.6	339	9	0.31	9.1
1	1	63	0.774691	184.377	0.138889	73.4568	246.21	6.37	39.3	2.51	50.9	3.24	7.1	0.45	2.4	0.15	0.3	0.02	3.21	122	0.366	114	38	333	58.7	13.9	238	11.3	0.25	10.5
1	1	61	2.11538	440	0.490385	200	406.32	3.8	57.9	2.2	27.4	1.04	13.4	0.51	0.8	0.03	0.5	0.02	3.81	127	0.385	101	33.3	330	49.6	13.4	208	11.2	0.22	10.4
1	0	64	10.5342	2412.34	0.616438	313.699	177.56	8.9	86.4	7.69	8.2	0.73	5.1	0.45	0.1	0.01	0.2	0.02	2.42	68	0.22	90.9	28.1	309	48.4	15.1	229	9.7	0.23	10.1
1	1	78	3.7619	1057.1	0.517007	191.156	318.02	7.88	70.2	5.53	18.7	1.47	9.6	0.76	0.9	0.07	0.6	0.05	4.1	123	0.376	91.7	30	327	52.4	15.6	281	9.4	0.25	9.1
1	1	67	2.59223	487.34	0.485437	182.524	267.56	4.23	63.1	2.67	24.3	1.03	11.8	0.5	0.5	0.02	0.3	0.01	4.27	145	0.455	106.6	34	319	51.9	13.2	188	16	0.217	11.5
1	0	55	1.49618	311.206	0.167939	158.779	256.39	3.53	55.6	1.96	37.2	1.31	6.2	0.22	0.8	0.03	0.2	0.01	3.11	90	0.29	93.1	29.1	312	47.4	13.8	208	15.7	0.188	9
1	0	58	6.29412	270.647	0.735294	126.471	212.49	2.78	77	2.14	12.2	0.34	9	0.25	1.1	0.03	0.7	0.02	3.89	115	0.362	93.1	29.6	318	54.8	16.2	43	17.8	0.05	11.8
1	1	61	1.70968	239.355	0.232258	90.3226	176.53	4.78	55.5	2.65	32.4	1.55	7.5	0.36	4.2	0.2	0.4	0.02	4.43	146	0.418	94.4	33	349	42.6	12.3	140	12	0.15	10.6
1	0	74	3.82581	1415.55	0.554839	238.71	202.23	8.47	70	5.93	18.3	1.55	10.2	0.86	1.4	0.12	0.1	0.01	3.65	106	0.342	93.7	29	310	49.1	14.6	370	9.5	0.35	9.6
1	0	79	2.10651	303.337	0.272189	85.2071	445.29	5.77	61.7	3.56	29.3	1.69	8	0.46	0.7	0.04	0.3	0.02	2.93	103	0.317	108.2	35.2	325	62.5	16	144	11.6	0.15	10.4
1	0	62	1.40645	210.968	0.2	96.7742	290.84	4.12	53	2.18	37.6	1.55	7.5	0.31	1.7	0.07	0.2	0.01	3.6	119	0.37	102.8	33.1	322	50.1	13.2	150	11.3	0.16	10.5
0	1	79	5.28125	1394.25	0.1875	412.5	305.96	4.14	81.6	3.38	15.5	0.64	2.8	0.12	0.1	0	0	0	3.61	97	0.294	81.5	26.9	330	40.1	13.2	264	15.9	0.22	8.3
0	0	59	1.09548	266.201	0.211055	122.111	192.99	4.66	46.8	2.18	42.7	1.99	9	0.42	0.9	0.04	0.6	0.03	4.48	135	0.417	93.1	30.1	324	42.9	12.6	243	10.6	0.23	9.5
0	1	65	26.7037	4593.04	0.518519	637.037	142.46	7.72	93.4	7.21	3.5	0.27	1.8	0.14	1.2	0.09	0.1	0.01	2.56	72	0.237	92.5	28	303	50.2	14.8	172	16	0.17	9.9
0	1	81	5.52381	1524.57	0.657143	262.857	264.51	11.22	51.7	5.8	9.4	1.05	6.1	0.69	32.3	3.62	0.5	0.06	3.36	106	0.324	96.4	31.5	327	47.7	13.7	276	9.5	0.26	9.6
0	0	45	1.98246	404.421	0.438596	357.895	544.35	1.99	56.8	1.13	28.4	0.57	12.8	0.25	1.6	0.03	0.4	0.01	3.44	107	0.321	93.3	31.3	335	41.2	11.9	204	16	0.184	9
0	0	56	2.66667	781.333	0.319444	406.944	464.6	2.87	66.9	1.92	25.1	0.72	8	0.23	0	0	0	0	3.88	122	0.359	92.5	31.4	340	43.5	12.8	293	11.9	0.31	10.6
0	0	36	3.97368	731.158	0.201754	161.404	420.01	5.92	76.6	4.53	19.2	1.14	3.9	0.23	0.1	0.01	0.2	0.01	4.06	124	0.387	95.3	30.6	322	45.9	13.1	184	15.7	0.193	10.5
0	1	71	6.76471	196.176	0.607843	56.8627	323.03	4.3	80.2	3.45	11.9	0.51	7.2	0.31	0.7	0.03	0	0	4.35	133	0.393	90.3	30.6	338	43	13.3	29	21.4	0.04	13.1
0	0	55	4.14516	878.774	0.677419	170.968	320.02	7.24	71.1	5.14	17.1	1.24	11.6	0.84	0.1	0.01	0.1	0.01	3.91	123	0.339	86.7	31.5	363	40.4	12.7	212	10.9	0.21	10.1
0	0	11	4.02752	845.78	0.302752	192.661	309.98	5.88	74.7	4.39	18.5	1.09	5.6	0.33	1.1	0.06	0.1	0.01	3.12	88	0.275	88	28.1	320	43.6	13.4	210	16.6	0.222	10.6
0	0	43	7.625	38.125	0.642857	8.92857	293.87	5.19	82.3	4.27	10.8	0.56	6.9	0.36	0	0	0	0	1.62	55	0.188	116	34	293	97.6	23.5	5
0	0	65	3.26549	744.531	0.504425	201.77	290.84	5.52	66.8	3.69	20.5	1.13	10.3	0.57	2.2	0.12	0.2	0.01	3.51	114	0.346	98.6	32.5	329	52.3	14.5	228	13.5	0.26	11.3
0	0	16	4.97931	1015.78	0.503448	140.69	286.8	9.45	76.5	7.22	15.3	1.45	7.7	0.73	0.4	0.04	0.1	0.01	3.85	111	0.343	89.1	28.7	323	50.7	15.4	204	16.1	0.198	9.7
0	0	24	2.05046	543.372	0.302752	121.56	276.68	7.36	60.7	4.47	29.6	2.18	9	0.66	0.3	0.02	0.4	0.03	4.32	124	0.384	88.9	28.7	323	44.8	13.8	265	7.8	0.22	8.4
0	0	29	4.44231	1617	0.211538	700	255.37	2.94	78.2	2.31	17.8	0.52	3.9	0.11	0.1	0	0	0	2.86	74	0.233	81.3	26	319	44.6	14.8	364	15.7	0.286	7.9
0	0	57	1.45699	412.328	0.22043	152.151	253.34	5.14	52.9	2.71	36.2	1.86	7.9	0.41	2.5	0.13	0.5	0.03	4.02	128	0.395	98.3	31.8	323	46.1	12.6	283	15.5	0.255	9
0	0	17	1.27273	170.545	0.151515	203.03	249.26	1.62	51.9	0.84	40.7	0.66	6.2	0.1	0.6	0.01	0.6	0.01	3.55	101	0.307	86.5	28.5	329	49.4	15.6	134	17.1	0.17	12.9
0	0	64	3.12791	509.849	0.383721	189.535	242.13	3.97	67.7	2.69	21.7	0.86	8.3	0.33	1.5	0.06	0.8	0.03	4.59	146	0.424	92.4	31.8	344	42.2	12.7	163	10.7	0.16	10.1
0	0	56	1.38889	358.333	0.246914	159.259	236.01	4.4	51.2	2.25	36.8	1.62	9.1	0.4	2.7	0.12	0.2	0.01	4.42	134	0.409	92.5	30.3	328	47.6	14	258	14.8	0.3	11.7
0	0	74	1.40164	217.254	0.327869	127.049	233.97	3.76	45.6	1.71	32.4	1.22	10.6	0.4	9.8	0.37	1.6	0.06	3.89	109	0.349	89.7	28	312	52.2	15.9	155	14.8	0.18	11.3
0	0	37	5.40385	1437.42	0.557692	511.538	217.61	3.64	77.4	2.81	14.2	0.52	7.9	0.29	0.3	0.01	0.2	0.01	3.84	116	0.369	96	30.1	314	47.5	13.5	266	15.6	0.273	10.3
0	0	31	9.94737	1770.63	0.263158	468.421	215.56	4.26	88.4	3.78	9	0.38	2.4	0.1	0.1	0	0.1	0	3.65	95	0.291	79.9	25.9	325	39.5	13.3	178	16.6	0.176	9.9
0	0	32	4.88462	923.192	0.179487	242.308	215.56	4.73	80.5	3.81	16.5	0.78	3	0.14	0	0	0	0	4.12	119	0.364	88.3	28.9	327	42.9	13.2	189	10.1	0.18	9.6
0	0	34	1.96212	472.871	0.219697	182.576	209.42	4.25	61.1	2.59	31	1.32	6.8	0.29	0.6	0.03	0.5	0.02	4.26	129	0.395	92.7	30.3	327	42.7	12.6	241	16	0.246	10.3
0	0	21	0.744681	153.404	0.205674	146.099	206.34	2.86	36.8	1.05	49.3	1.41	10.1	0.29	3.1	0.09	0.7	0.02	3.59	107	0.324	90.3	29.8	330	41.2	12.6	206	11.2	0.21	10
0	1	64	3.38393	741.08	0.392857	195.536	206.34	5.53	68.4	3.79	20.3	1.12	8	0.44	2.9	0.16	0.4	0.02	4.71	141	0.42	89.2	29.9	336	42.5	13	219	11.5	0.22	10.7
0	0	58	1.51724	31.8621	0.62069	24.1379	204.29	2.77	47.6	1.32	31.4	0.87	19.5	0.54	1.1	0.03	0.4	0.01	3.28	109	0.324	98.8	33.2	336	47.8	13.2	21	14	0.02	11.9
0	0	29	1.49587	281.223	0.330579	155.372	204.29	3.44	52.6	1.81	35.2	1.21	11.6	0.4	0.3	0.01	0.3	0.01	3.89	117	0.366	94.1	30.1	320	47.8	14	188	13	0.22	11.3
0	0	39	3.3301	549.466	0.485437	160.194	202.23	5.05	67.9	3.43	20.4	1.03	9.9	0.5	1.6	0.08	0.2	0.01	3.76	109	0.327	87	29	333	43.5	14.3	165	14	0.19	10
0	0	56	1.03004	291.502	0.218884	121.459	200.18	5.53	43.5	2.4	42.1	2.33	9.2	0.51	4.7	0.26	0.5	0.03	4.08	131	0.385	94.4	32.1	340	41.7	12	283	10.9	0.28	9.3
0	0	56	0.582278	120.532	0.259494	131.013	194.02	3.05	30.2	0.92	51.8	1.58	13.4	0.41	4.3	0.13	0.3	0.01	3.85	115	0.353	91.7	29.9	326	46.2	13.7	207	8.8	0.19	9.5
0	1	74	5.69536	1611.79	0.125828	187.417	192.99	10.31	83.5	8.6	14.6	1.51	1.8	0.19	0.1	0.01	0	0	3.66	104	0.328	89.5	28.5	318	47.5	14.3	283	16.2	0.269
0	1	55	1.45638	202.436	0.355705	93.2886	190.93	4.26	50.9	2.17	35	1.49	12.4	0.53	1.2	0.05	0.5	0.02	4.05	129	0.386	95.3	31.9	334	42	12.1	139	14.3	0.16	11.4
0	0	32	1.77741	319.934	0.242525	59.8007	190.93	9.12	58.7	5.35	33	3.01	8	0.73	0.1	0.01	0.2	0.02	4.15	102	0.327	78.8	24.6	312	66.7	24.2	180	11.8	0.17	9.2
0	0	69	10.5625	1774.5	0.90625	525	188.88	4.05	83.5	3.38	7.9	0.32	7.2	0.29	1.2	0.05	0.2	0.01	2.96	96	0.3	101.4	32.4	320	50.2	13.5	168	11.2	0.17	10
0	0	23	1.35172	258.179	0.275862	131.724	183.73	3.88	50.5	1.96	37.4	1.45	10.3	0.4	1.5	0.06	0.3	0.01	3.51	109	0.326	92.9	31.1	334	43.4	12.7	191	9.7	0.19	10
0	0	45	0.971014	65.058	0.130435	48.5507	164.15	2.92	45.9	1.34	47.3	1.38	6.2	0.18	0.3	0.01	0.3	0.01	4.23	109	0.351	83	25.8	311	44.6	15	67
0	0	52	3.375	388.125	0.3375	143.75	163.12	3.91	69	2.7	20.5	0.8	6.9	0.27	3.1	0.12	0.5	0.02	4.2	117	0.368	87.6	27.9	318	45.7	14.3	115	13.4	0.13	11.5
0	0	16	0.84507	32.1127	0.0915493	26.7606	163.12	2.75	43.7	1.2	51.6	1.42	4.7	0.13	0	0	0	0	2.37	79	0.213	89.9	33.3	371	41.4	16.5	38	12.6	0.04	10.6
0	0	47	2.50314	523.157	0.163522	131.447	161.06	6.01	66	3.98	26.5	1.59	4.4	0.26	2.9	0.17	0.2	0.01	4.53	130	0.389	85.9	28.6	333	37.5	11.8	209	16.2	0.209	10
0	1	28	1	184	0.181373	90.1961	158.99	4.54	44.8	2.04	45	2.04	8.2	0.37	1.6	0.07	0.4	0.02	5.37	159	0.474	88.2	29.5	335	41.3	12.7	184	16.2	0.188	10.2
0	1	57	2.06278	569.327	0.26009	123.767	157.96	7.63	60.3	4.6	29.2	2.23	7.6	0.58	2.4	0.18	0.5	0.04	4.7	138	0.413	87.9	29.4	334	39	12.2	276	10.4	0.26	9.5
0	0	65	1.87069	338.595	0.267241	156.034	156.93	3.65	59.1	2.17	31.9	1.16	8.6	0.31	0.4	0.01	0	0	4.25	132	0.404	95	31.1	327	46.4	13.4	181	16.1	0.183	10.1
0	0	46	2.66667	1176	0.217687	300	156.93	5.79	67.7	3.92	25.4	1.47	5.5	0.32	0.9	0.05	0.5	0.03	3.8	108	0.351	92.4	28.4	308	43.6	12.8	441	10.7	0.44	10
0	0	32	5.12987	1097.79	0.441558	277.922	155.9	5.09	77.6	3.95	15.1	0.77	6.7	0.34	0.4	0.02	0.2	0.01	3.99	112	0.338	84.7	28.1	331	43.8	14.3	214	8.5	0.19	8.9
0	0	47	1.24581	125.827	0.156425	56.4246	154.86	4.26	48.2	2.23	38.7	1.79	6.1	0.28	6.9	0.32	0.1	0	3.65	115	0.354	97.1	31.5	325	46.4	12.9	101	16.2	0.141	14
0	0	53	1.46457	391.039	0.259843	210.236	154.86	3.53	52.7	1.86	36	1.27	9.3	0.33	1.7	0.06	0.3	0.01	4.53	132	0.404	89.2	29.1	327	40.5	12.4	267	11	0.27	10.1
0	1	21	1.09202	219.497	0.226994	123.313	152.8	3.92	45.4	1.78	41.7	1.63	9.4	0.37	2.5	0.1	1	0.04	4.35	125	0.396	91	28.7	315	44.4	13.3	201	16.1	0.205	10.2
0	0	73	2.31081	330.446	0.189189	193.243	151.76	2.66	64.6	1.71	27.7	0.74	5.2	0.14	2.3	0.06	0.2	0.01	4.2	126	0.398	94.8	29.9	315	50.3	14.4	143	16.5	0.201	14
0	0	38	2.43523	801.192	0.19171	170.466	151.76	7.09	66.4	4.7	27.2	1.93	5.2	0.37	0.8	0.06	0.4	0.03	4.27	130	0.397	93	30.4	327	43.1	12.6	329	9.2	0.3	9
0	0	60	1.98319	293.513	0.277311	124.37	148.66	3.95	60.1	2.36	30	1.19	8.3	0.33	1.2	0.05	0.4	0.02	4.08	121	0.362	88.8	29.7	334	44.3	13.7	148	16.2	0.153	10.3
0	0	54	3.44248	808.982	0.389381	207.965	146.59	5.74	67.7	3.89	19.7	1.13	7.7	0.44	4.2	0.24	0.7	0.04	4.05	118	0.371	91.6	29.1	318	41.5	12.4	235	10.7	0.23	9.9
0	0	65	2.91089	753.921	0.425743	256.436	143.49	4.48	65.6	2.94	22.5	1.01	9.7	0.43	2	0.09	0.2	0.01	4.08	118	0.38	93.1	28.9	311	50.5	14.7	259	16.2	0.237	9.1
0	0	61	2.86555	495.739	0.310924	145.378	142.46	5.11	66.8	3.41	23.3	1.19	7.2	0.37	2.3	0.12	0.4	0.02	3.67	121	0.345	94	33	351	43.8	12.9	173	17.6	0.22	12.5
0	0	42	2.71667	108.667	0.28	13.3333	139.35	12	67.9	8.15	25	3	7	0.84	0	0	0.1	0.01	3.92	108	0.368	93.9	27.6	293	51.1	14.9	40
0	0	78	2.31214	1063.58	0.283237	265.896	137.28	6.24	64.2	4	27.7	1.73	7.8	0.49	0.1	0.01	0.2	0.01	3.79	110	0.339	89.5	29.1	325	44.4	13.4	460	15.8	0.43	9.3
0	0	62	1.84211	241.316	0.355263	172.368	134.18	2.5	56	1.4	30.4	0.76	10.8	0.27	2	0.05	0.8	0.02	3.98	123	0.348	87.4	30.9	353	39.9	12.7	131	12.4	0.14	10.7
0	0	41	7.80909	1593.05	0.7	185.455	133.14	10.48	82	8.59	10.5	1.1	7.3	0.77	0.1	0.01	0.1	0.01	4.31	125	0.367	85.2	29	341	39.8	13	204	12.4	0.22	10.7
0	1	29	6.20915	1049.35	0.699346	110.458	131.07	12.6	75.4	9.5	12.1	1.53	8.5	1.07	2.4	0.3	1.6	0.2	4.06	130	0.38	93.6	32	342	53.1	15.5	169	22.6	0.23	13.7
0	0	49	1.84956	347.717	0.176991	166.372	131.07	3.5	59.7	2.09	32.4	1.13	5.6	0.2	1.8	0.06	0.5	0.02	3.83	111	0.339	88.5	29.1	329	40.8	12.5	188	15.7	0.198	10.5
0	0	51	4.68224	1133.1	0.252336	226.168	126.93	6.37	78.6	5.01	16.8	1.07	4.2	0.27	0.2	0.01	0.2	0.01	4.13	100	0.307	74.3	24.2	326	54.4	20.3	242	10.9	0.24	9.8
0	1	38	1.77122	573.875	0.391144	119.557	126.93	8.72	55	4.8	31.1	2.71	12.2	1.06	1.4	0.12	0.3	0.03	4.4	127	0.388	88.2	28.9	327	45.2	14.1	324	9.3	0.3	9.2
0	0	24	1.78243	445.607	0.263598	104.603	125.89	7.4	57.6	4.26	32.3	2.39	8.5	0.63	1.2	0.09	0.4	0.03	4.28	126	0.378	88.3	29.4	333	41.7	13	250	11.6	0.25	9.9
0	0	35	3.35526	493.224	0.539474	193.421	125.89	3.73	68.3	2.55	20.4	0.76	11	0.41	0.3	0.01	0	0	3.1	68	0.239	77.1	21.9	285	59.7	21.8	147
0	0	70	3.54124	1104.87	0.221649	160.825	120.71	9.31	73.9	6.87	20.8	1.94	4.6	0.43	0.3	0.03	0.4	0.04	4.12	131	0.402	97.6	31.8	326	47.7	13.4	312	12.2	0.32	10.3
0	0	78	1.84507	164.211	0.267606	125.352	120.71	2.38	54.9	1.31	29.8	0.71	8	0.19	7.3	0.17	0	0	2.7	87	0.257	95	32	337	45.4	12.9	89	16.2	0.085	9.5
0	1	51	3.75	813.75	0.3125	169.531	119.67	6.54	73.4	4.8	19.6	1.28	6.1	0.4	0.6	0.04	0.3	0.02	4.43	130	0.397	89.6	29.3	327	47.5	14.6	217	11.8	0.23	10.5
0	0	34	3.03419	846.538	0.239316	238.462	108.26	5.1	69.7	3.55	23	1.17	5.4	0.28	1.6	0.08	0.3	0.02	4.07	93	0.3	73.7	22.9	310	45.3	16.8	279	15.9	0.267	9.6
0	0	31	2.24865	676.843	0.345946	162.703	104.11	6.96	59.8	4.16	26.6	1.85	9.2	0.64	4.3	0.3	0.1	0.01	3.72	97	0.311	83.6	26.1	312	50.9	16.7	301	14.5	0.34	11.1
0	0	33	1.44397	378.319	0.193966	112.931	103.07	6.26	53.4	3.35	37.1	2.32	7.2	0.45	1.8	0.11	0.5	0.03	3.63	111	0.352	97	30.6	315	45.1	12.6	262	13.1	0.3	11.6
0	0	22	3.82222	1364.53	0.207407	264.444	91.65	6.79	76	5.16	19.9	1.35	4.1	0.28	0	0	0	0	3.62	111	0.343	94.8	30.7	324	51.5	14.8	357	9.4	0.34	9.5
0	0	29	1.8692	644.873	0.172996	145.57	87.49	7.26	60.9	4.43	32.6	2.37	5.7	0.41	0.6	0.04	0.2	0.01	3.14	86	0.267	85.1	27.3	321	44.1	14.2	345	15.5	0.337	9.8
0	0	34	1.99219	400.43	0.367187	157.031	78.13	4.37	58.3	2.55	29.3	1.28	10.8	0.47	1.1	0.05	0.5	0.02	4.04	117	0.346	85.6	29	338	39	12.7	201	11.6	0.21	10.3
0	0	37	5.28866	1168.79	0.360825	227.835	311.99	6.52	78.6	5.13	14.9	0.97	5.4	0.35	0.8	0.05	0.3	0.02	4.28	115	0.369	86.2	26.9	312	62.9	20.1	221	10.2	0.21	9.5
0	0	25	10.9158	2270.48	0.231579	218.947	243.15	11.6	89.4	10.37	8.2	0.95	1.9	0.22	0.5	0.06	0	0	4.98	151	0.44	88.3	30.4	344	37.6	11.7	208	16.1	0.208	10
0	1	51	3.89394	1799	0.242424	350	115.53	6.91	74.4	5.14	19.1	1.32	4.7	0.32	1.4	0.1	0.4	0.03	5.04	146	0.439	87	29	333	38.7	12	462	15.8	0.408	8.8
0	0	63	1.17647	105.882	0.264706	88.2353	151.76	2.56	47	1.2	39.8	1.02	10.5	0.27	2.3	0.06	0.4	0.01	3.65	109	0.347	95.1	29.9	314	46.1	13.3	90	18.2	0.11	12.6
0	0	23	2.53	508.53	0.23	201	129	3.87	65.4	2.53	25.8	1	5.9	0.23	2.6	0.1	0.3	0.01	4.04	118	0.349	86.4	29.2	338	40.1	12.9	201	12.3	0.22	10.9
0	0	22	1.70335	415.617	0.172249	116.746	95.8	6.02	59.1	3.56	34.7	2.09	6	0.36	0	0	0.2	0.01	3.54	99	0.318	89.8	28	311	41.1	12.5	244	11.2	0.26	10.5
0	0	55	0.444444	48.4444	0.125	75.6944	168.28	3.7	17.4	0.64	39	1.44	4.8	0.18	38.3	1.42	0.5	0.02	4	110	0.363	90.7	27.4	302	51.1	15.3	109	16.8	0.138	12.7
0	1	28	1.92166	484.258	0.387097	116.129	95.8	7.56	55.2	4.17	28.7	2.17	11.1	0.84	4.5	0.34	0.5	0.04	5.48	168	0.491	89.6	30.7	342	42.6	13	252	12.5	0.26	10.5
0	0	37	1.34437	342.815	0.145695	168.874	129	3.78	53.8	2.03	39.9	1.51	5.8	0.22	0.5	0.02	0	0	4.06	119	0.365	89.9	29.3	326	43.8	13.5	255	10.2	0.24	9.6
0	0	55	1.82787	573.951	0.180328	257.377	121.75	3.85	57.8	2.23	31.8	1.22	5.7	0.22	4.5	0.17	0.2	0.01	4.19	126	0.395	94.3	30	318	43.3	12.4	314	15.8	0.29	9.3
0	0	65	2.13669	728.612	0.208633	245.324	186.82	4.74	62.6	2.97	29.4	1.39	6.1	0.29	1.7	0.08	0.2	0.01	3.36	102	0.314	93.4	30.2	324	48.4	14.1	341	15.9	0.324	9.5
0	1	17	4.95694	1397.86	0.258373	134.928	105.15	13.07	79.3	10.36	16	2.09	4.1	0.54	0.6	0.08	0	0	5.85	171	0.495	84.5	29.1	345	38.1	12.2	282	15.8	0.262	9.3
0	0	66	0.925651	196.238	0.200743	78.8104	230.91	5.78	43.2	2.49	46.5	2.69	9.3	0.54	0.7	0.04	0.3	0.02	3.99	127	0.402	100.8	31.8	316	51.8	13.9	212	11.5	0.22	10.5
0	0	53	1.45378	264.588	0.117647	152.941	182.71	3.1	55.9	1.73	38.4	1.19	4.5	0.14	0.6	0.02	0.6	0.02	4.13	127	0.392	94.9	30.8	324	42.7	12.1	182	13.4	0.2	11
0	1	53	4.32704	558.189	0.308176	81.1321	309.96	8.97	76.7	6.88	17.7	1.59	5.5	0.49	0	0	0.1	0.01	4.2	131	0.4	95.2	31.2	328	57.3	17.4	129	0.18	13.6
0	0	33	2.03774	171.17	0.330189	79.2453	91.65	3.64	59.4	2.16	29.1	1.06	9.6	0.35	1.6	0.06	0.3	0.01	2.54	78	0.245	96.5	30.7	318	54.4	16.3	84	13.5	0.09	11.1
0	0	56	1.25275	280.615	0.214286	123.077	306.96	4.83	47.2	2.28	37.7	1.82	8.1	0.39	6	0.29	1	0.05	4.94	141	0.432	87.4	28.5	326	41.5	13.1	224	0.21	9.9	9.2
0	0	32	2.26871	775.898	0.282313	116.327	186.82	11.09	60.1	6.67	26.5	2.94	7.5	0.83	4.9	0.54	1	0.11	4.79	133	0.415	86.6	27.8	320	42.4	13.6	342	9.6	0.31	9.1
0	0	52	1.00467	171.799	0.242991	79.9065	158.99	4.98	43.2	2.15	43	2.14	10.4	0.52	3.2	0.16	0.2	0.01	4.23	112	0.37	87.5	26.5	303	53.1	16.8	171	8.8	0.15	9
0	0	58	1.68047	315.929	0.130178	111.243	134.18	4.78	59.4	2.84	35.3	1.69	4.6	0.22	0.7	0.03	0	0	4.19	126	0.377	90.1	30.2	335	44.2	13.4	188	16.2	0.193	10.3
0	0	29	2.49042	978.736	0.283525	150.575	102.03	9.99	65.1	6.5	26.1	2.61	7.4	0.74	1	0.1	0.4	0.04	4.81	142	0.451	93.8	295	315	49.3	14.6	393	11.1	0.4	10.1
0	0	32	1.30568	390.397	0.28821	130.568	111.38	6.15	48.6	2.99	37.2	2.29	10.7	0.66	2.8	0.17	0.7	0.04	4.76	138	0.426	89.5	29	324	40.1	12.2	299	12.5	0.32	10.7
0	1	17	5.9959	1097.25	0.532787	75	143.49	18.42	79.4	14.63	13.2	2.44	7.1	1.3	0.1	0.02	0.2	0.03	5.18	130	0.395	76.3	25.1	329	41.8	15.4	183
0	0	31	1.4507	448.268	0.15493	145.07	113.45	5.65	54.8	3.09	37.7	2.13	5.8	0.33	1.2	0.07	0.5	0.03	3.89	120	0.36	92.5	30.8	333	42	12.5	309	10.1	0.29	9.5
0	0	59	1.16746	50.201	0.23445	20.5742	188.88	5.29	46.1	2.44	39.5	2.09	9.3	0.49	4.3	0.23	0.8	0.04	4.63	136	0.385	83.2	29.4	353	37.7	12.6	43	20.3	0.06	13.8
0	1	67	3.34375	929.562	0.25	173.75	389.61	7.65	69.9	5.35	20.9	1.6	5.2	0.4	3.7	0.28	0.3	0.02	3.97	106	0.343	86.4	26.6	308	43.8	13.6	278	16.1	0.299	10.8
0	1	60	2.10185	111.398	0.194444	49.0741	577.87	3.58	63.3	2.27	30.3	1.08	5.8	0.21	0.5	0.02	0.1	0	1.63	66	0.203	124.7	40.4	324	93.2	20	53	16.8	0.06	11.3
0	1	77	5.47458	2408.81	0.355932	372.881	210.44	8.11	79.7	6.46	14.5	1.18	5.2	0.42	0.4	0.03	0.2	0.02	4.14	123	0.384	92.8	29.7	320	42.3	12.3	440	8.6	0.39	8.8
0	0	43	6.73684	498.526	0.578947	389.474	586.19	1.58	81	1.28	12	0.19	7	0.11	0	0	0	0	3.19	93	0.295	92.5	29.2	315	58.7	17.4	74
0	0	49	1.22785	287.316	0.248945	98.7342	172.41	5.95	48.9	2.91	39.8	2.37	9.9	0.59	1.2	0.07	0.2	0.01	4.37	134	0.375	85.8	30.7	357	36.8	11.9	234
0	0	47	7.21429	4934.57	0.459184	697.959	184.76	8.56	82.7	7.07	11.5	0.98	5.2	0.45	0.3	0.03	0.3	0.03	3.47	99	0.316	91.1	28.7	315	48.1	14.4	684	15.2	0.538	7.9
0	0	19	1.78431	326.529	0.313725	358.824	164.15	1.59	57.3	0.91	31.8	0.51	9.9	0.16	0.8	0.01	0.2	0	3.38	96	0.295	87.3	28.4	325	37	11.4	183	15.9	0.16	8.7
0	0	71	13.4455	5929.49	0.653465	436.634	210.44	15.29	88.9	13.58	6.6	1.01	4.3	0.66	0.1	0.02	0.1	0.02	3.46	106	0.334	96.5	30.6	317	45.8	13.1	441	9.4	0.441	9.3
0	0	73	2	502	0.230769	160.897	92.68	5.36	58.2	3.12	29.1	1.56	6.7	0.36	5.6	0.3	0.4	0.02	3.58	110	0.328	91.6	30.7	335	43	13.1	251	13.3	0.27	10.9
0	0	16	1.06173	211.284	0.444444	245.679	180.65	2.09	41.1	0.86	38.8	0.81	17.2	0.36	2.4	0.05	0.5	0.01	3.93	96	0.319	81.2	24.4	301	61.4	20.9	199	19.5	0.26	13.2
0	0	61	3.8	661.2	0.509091	316.364	373.82	2.93	71.4	2.09	18.8	0.55	9.4	0.28	0.4	0.01	0	0	3.69	98	0.311	84.4	26.5	315	44.1	14.2	174	16.1	0.154	8.9
0	0	57	1.49624	320.195	0.270677	160.902	496.19	3.73	53.2	1.99	35.7	1.33	9.7	0.36	1.1	0.04	0.3	0.01	4.01	116	0.369	92	28.9	314	44.6	13.3	214	10.5	0.21	10
0	0	41	1.9881	598.417	0.392857	179.167	396.5	5.71	58.4	3.34	29.4	1.68	11.6	0.66	0.2	0.01	0.4	0.02	3.31	101	0.287	86.7	30.5	352	40	12.8	301	10.7	0.31	10.2
0	0	41	2	338	0.263158	148.246	98.92	3.78	60.4	2.28	30.1	1.14	7.9	0.3	1.3	0.05	0.3	0.01	3.68	118	0.363	98.7	32.1	325	47.8	13.2	169	16	0.182	10.8
0	1	29	2.81333	329.16	0.36	156	275.67	3.17	66.7	2.11	23.6	0.75	8.6	0.27	0.8	0.03	0.3	0.01	3.92	114	0.349	89	29.2	328	43.2	13.2	117	16.7	0.129	11
0	0	69	4.27273	965.636	0.373737	228.283	157.26	5.62	75.2	4.23	17.6	0.99	6.6	0.37	0.2	0.01	0.4	0.02	2.49	84	0.255	102.4	33.7	329	45.3	12	226	10.5	0.23	10.3
0	0	55	2.3114	1060.93	0.320175	201.316	201.21	8.5	62	5.27	26.8	2.28	8.6	0.73	2.2	0.19	0.4	0.03	4.47	125	0.393	87.9	28	318	43.5	13.6	459	10.1	0.43	9.3
0	0	57	3.31884	806.478	0.449275	176.087	197.1	6.64	68.9	4.58	20.8	1.38	9.3	0.62	0.8	0.05	0.2	0.01	4.55	137	0.426	93.6	30.1	322	47.5	13.8	243	17.1	0.33	13.4
0	0	71	1.43827	355.253	0.283951	152.469	224.77	4.74	49.1	2.33	34.2	1.62	9.7	0.46	5.9	0.28	1.1	0.05	3.86	121	0.362	93.8	31.3	334	42	12.2	247	9.5	0.23	9.3
0	0	52	1.34252	510.157	0.204724	149.606	150.73	6.71	50.8	3.41	37.9	2.54	7.7	0.52	2.7	0.18	0.9	0.06	5.59	116	0.399	71.4	20.8	291	43.8	17.3	380	12.2	0.39	10.2
0	0	60	4.48148	1425.11	0.395062	196.296	228.86	9.58	75.8	7.26	16.9	1.62	6.7	0.64	0.6	0.06	0	0	4.29	105	0.335	78.1	24.4	312	48.1	16.7	318	15.6	0.245	7.7
0	0	64	1.35811	252.608	0.391892	125.676	215.56	4.42	45.5	2.01	33.5	1.48	13.1	0.58	7.7	0.34	0.2	0.01	3.44	95	0.303	88.1	27.6	314	41.1	12.9	186	11.7	0.19	10.4
0	0	68	1.51974	275.072	0.256579	119.079	192.99	4.36	53	2.31	34.9	1.52	8.9	0.39	2.5	0.11	0.7	0.03	4	117	0.37	92.5	29.3	316	50.9	14.9	181	10.4	0.18	10
0	1	45	5.66667	1280.67	0.382353	221.569	206.34	7.21	80	5.78	14.2	1.02	5.4	0.39	0.2	0.01	0.2	0.01	3.7	114	0.352	95.3	30.9	325	41.8	11.8	226	15.5	0.208	9.6
0	0	47	3.73404	929.777	0.297872	132.447	244.17	9.55	73.5	7.02	19.7	1.88	5.9	0.56	0.7	0.07	0.2	0.02	4.42	125	0.395	89.4	28.3	316	40.6	12.2	249	16	0.227	11.1
0	1	27	7.65863	4304.15	0.417671	225.703	151.76	23.23	82	19.07	10.7	2.49	4.5	1.04	2.2	0.5	0.6	0.13	3.45	106	0.326	94.5	30.7	325	43.2	12.5	562	8.2	0.48	8.5
0	0	79	4.23684	627.053	0.45614	129.825	273.64	6.52	74	4.83	17.5	1.14	8	0.52	0.2	0.01	0.3	0.02	4.38	130	0.404	92.3	29.6	321	52.3	15.5	148	16.7	0.178	12
0	0	53	3.73077	1149.08	0.160256	197.436	238.05	7.65	76	5.82	20.4	1.56	3.3	0.25	0	0	0.3	0.02	3.16	102	0.321	101.6	32.3	318	55.9	14.8	308	12	0.32	10.6
0	0	38	0.981132	69.6604	0.216981	66.9811	338.04	2.43	42.6	1.04	43.8	1.06	9.3	0.23	4.3	0.1	0	0	3.87	119	0.372	96	30.8	321	50.7	14.1	71	16.6	0.086	12.1
0	0	52	1.625	578.5	0.160714	317.857	179.62	3.19	57.1	1.82	35.1	1.12	5.7	0.18	1.2	0.04	0.9	0.03	3.6	104	0.327	90.8	28.8	317	42.5	12.7	356	15.7	0.278	7.8
0	0	53	1.47899	349.042	0.361345	198.319	294.87	3.49	50.4	1.76	34.1	1.19	12.3	0.43	2.3	0.08	0.9	0.03	3.86	121	0.375	97.2	31.3	323	47.8	13.2	236	7.5	0.19	8
0	0	60	0.934426	57.9344	0.221311	50.8197	182.71	2.66	42.7	1.14	45.9	1.22	10.2	0.27	0.8	0.02	0.4	0.01	1.14	40	0.134	117.5	35.1	299	56.8	13.2	62	12	0.08	11.1
0	0	47	2.12308	335.446	0.346154	121.538	161.06	4.59	60.2	2.76	28.3	1.3	9.8	0.45	1.3	0.06	0.4	0.02	4.12	119	0.382	92.7	28.9	312	44.6	13.1	158	16.7	0.2	12.5
0	0	48	1.31624	109.248	0.17094	70.9402	189.91	2.96	52	1.54	39.5	1.17	6.8	0.2	1.4	0.04	0.3	0.01	4.03	111	0.329	81.6	27.5	337	46.2	15.5	83	16.1	0.11	12.8
0	1	76	1.59286	363.171	0.325	81.4286	244.17	8.98	49.7	4.46	31.2	2.8	10.1	0.91	8.7	0.78	0.3	0.03	4.23	135	0.407	96.1	32	333	53.8	15.3	228	16.1	0.2	8.8
0	0	62	2.19298	578.947	0.421053	231.579	189.91	4.28	58.4	2.5	26.7	1.14	11.2	0.48	3.4	0.15	0.3	0.01	4.24	110	0.346	81.7	25.9	317	44.6	14.9	264	15.7	0.234	8.9
0	0	41	0.791667	163.875	0.234375	107.812	201.21	3.94	38.6	1.52	48.7	1.92	11.4	0.45	0.8	0.03	0.5	0.02	3.68	115	0.346	94	31.3	332	46.8	13.7	207	10.2	0.2	9.6
0	1	78	3.5817	856.026	0.27451	156.209	157.96	7.56	72.6	5.48	20.2	1.53	5.6	0.42	1.4	0.11	0.2	0.02	3.11	88	0.283	91.3	28.4	312	47.3	14	239	16	0.24	10.1
0	0	50	1.7716	384.438	0.111111	133.951	127.96	4.87	58.9	2.87	33.3	1.62	3.7	0.18	3.7	0.18	0.4	0.02	4.41	118	0.375	85	26.8	315	44.2	14.3	217	11.9	0.23	10.8
0	0	30	2.88043	1532.39	0.103261	289.13	122.78	7.46	71.1	5.3	24.7	1.84	2.5	0.19	1.6	0.12	0.1	0.01	3.62	109	0.343	94.8	30.1	318	42.6	12.1	532	8.4	0.46	8.7
0	0	33	2.10356	420.712	0.165049	64.7249	107.22	10.17	63.9	6.5	30.4	3.09	5	0.51	0.4	0.04	0.3	0.03	4.79	151	0.463	96.7	31.5	326	52.3	14.7	200	11.8	0.2	10.2
0	1	36	2.91636	1589.42	0.443636	198.182	139.35	12.46	64.4	8.02	22.1	2.75	9.8	1.22	3.1	0.39	0.6	0.08	4.31	123	0.378	87.7	28.5	325	38	11.7	545	9.9	0.51	9.3
